# Supplementary material
Source: ML conference proceedings conference paper supplement (https://www.ecva.net/papers/eccv_2022/papers_ECCV/html/136650701_ECCV_2022_paper.php)
Supplement: Supplementary file 2 [file 136650701-supp.zip]

Archive with 4 entries (4 files):
- 3948-supp.pdf
- __MACOSX/._3948-supp.pdf
- supp_video.mp4
- __MACOSX/._supp_video.mp4
